# Supplementary material for: Evaluation of Exploratory Fluid Biomarker Results from a Phase 1 Senolytic Trial in Mild Alzheimer’s Disease
Source: Research Square preprint supplement (doi:10.21203/rs.3.rs-3994894/v1), 2024-03-08
Supplement: Supplementary file 2 [file c64ee0d37d2c907f8e60330b.docx]

**Supplementary Table 1**: Baseline and post-treatment cerebrospinal fluid tau levels measured by mass spectrometry

| **Tau Phosphorylation Ratios and Fragments** | **Baseline**  **Mean (SD)** | **Post-Treatment Mean (SD)** | **Fold Change** | **T-test(df),**  ***P* value,**  **95% CI** |
| --- | --- | --- | --- | --- |
| pT111/T111 (%) | 4.16 (0.87) | 4.26 (0.99) | 1.02 | t(1) = 2.14,  *P* = 0.278,  -5.78 to 4.12 |
| pT153/T153 (%) | 0.53 (0.30) | 0.61 (0.42) | 1.14 | t(4) = 0.354,  *P* = 0.742,  -0.51 to 0.66 |
| pT181/T181 (%) | 35.3 (2.34) | 34.8 (2.35) | 0.99 | t(4) = 2.042,  *P* = 0.111,  -1.17 to 0.18 |
| pS199/S199 (%) | 0.88 (0.20) | 0.85 (0.17) | 0.96 | t(4) = 0.948,  *P* = 0.397,  -0.13 to 0.07 |
| pS202/S202 (%) | 2.18 (0.58) | 2.2 (0.56) | 1.01 | t(4) = 0.198,  *P* = 0.853,  -0.20 to 0.23 |
| pT205/T205 (%) | 0.97 (0.19) | 1.02 (0.15) | 1.05 | t(4) = 1.575,  *P* = 0.190,  -0.035 to 0.13 |
| pS208/S208 (%) | 0.15 (0.03) | 0.14 (0.02) | 0.99 | t(4) = 0.363,  *P* = 0.735,  -0.015 to 0.012 |
| pT217/T217 (%) | 12.10 (1.22) | 12.03 (1.27) | 0.99 | t(4) = 0.158,  *P* = 0.882,  -1.30 to 1.16 |
| pT231/T231 (%) | 18.2 (3.83) | 16.2 (4.27) | 0.89 | t(4) = 0.796,  *P* = 0.471,  -9.27 to 5.14 |
| pT153 (ng ml-1) | 0.018 (0.007) | 0.024 (0.018) | 1.35 | t(4) = 0.953,  *P* = 0.395,  -0.012 to 0.024 |
| tau 151-155 (ng ml-1) | 3.84 (1.36) | 3.94 (1.15) | 1.03 | t(4) = 0.572,  *P* = 0.598,  -0.36 to 0.55 |
| tau 181-190 (ng ml-1) | 3.68 (1.29) | 3.91 (1.16) | 1.06 | t(4) = 1.007,  *P* = 0.371,  -0.41 to 0.87 |
| pT181 (ng ml-1) | 1.32 (0.49) | 1.37 (0.42) | 1.04 | t(4) = 0.695,  *P* = 0.526,  -0.16 to 0.27 |
| pS199 (ng ml-1) | 0.034 (0.012) | 0.034 (0.009) | 1.00 | t(4) = 0.084,  *P* = 0.937,  -0.004 to 0.005 |
| pS202 (ng ml-1) | 0.081 (0.027) | 0.085 (0.016) | 1.05 | t(4) = 0.638,  *P* = 0.558,  -0.014 to 0.022 |
| pS208 (ng ml-1) | 0.006 (0.002) | 0.006 (0.001) | 1.02 | t(4) = 0.298,  *P* = 0.781,  -0.001 to 0.001 |
| pT205 (ng ml-1) | 0.037 (0.014) | 0.041 (0.010) | 1.08 | t(4) = 1.608,  *P* = 0.183,  -0.002 to 0.009 |
| T195-210 (ng ml-1) | 3.88 (1.32) | 4.02 (0.97) | 1.04 | t(4) = 0.615,  *P* = 0.572,  -0.47 to 0.74 |
| pT217 (ng ml-1) | 0.31 (0.11) | 0.32 (0.09) | 1.04 | t(4) = 0.480,  *P* = 0.657,  -0.055 to 0.079 |
| T212-221 (ng ml-1) | 2.56 (0.93) | 2.67 (0.69) | 1.04 | t(4) = 0.716,  *P* = 0.514,  -0.31 to 0.53 |
| pT231 (ng ml-1) | 0.090 (0.040) | 0.086 (0.036) | 0.96 | t(4) = 0.289,  *P* = 0.787,  -0.037 to 0.030 |
| T226-230 (ng ml-1) | 0.52 (0.23) | 0.54 (0.19) | 1.04 | t(4) = 0.461,  *P* = 0.669,  -0.109 to 0.153 |
| MTBR-tau212-221 (ng ml-1) | 0.15 (0.03) | 0.14 (0.03) | 0.95 | t(4) = 1.926,  *P* = 0.126,  -0.018 to 0.003 |
| MTBR-tau243-254 (ng ml-1) | 0.60 (0.14) | 0.62 (0.13) | 1.03 | t(4) = 0.814,  *P* = 0.461,  -0.040 to 0.073 |
| Note: Baseline to post-treatment changes were assessed using two-sided, paired sample t-tests, 95% CI: 95 percent confidence interval for the post *versus* baseline mean difference, *P* < 0.05. No correction for multiple comparisons was made due to small sample size (N = 2-5). df = degrees of freedom, MTBR = microtubule binding region, pS = phosphorylated serine, pT = phosphorylated tau, SD = standard deviation, T = tau | | | | |

**Supplementary Table 2**. Plasma, cerebrospinal fluid and urine cytokines, chemokines, and proteinases, measured by multiplex immunoassay protein panels

| **Protein** | **Baseline**  **Mean (SD)** | **Post-Treatment Mean (SD)** | **Fold Change** | **T-test(df), *P* value,**  **95% CI** |
| --- | --- | --- | --- | --- |
| **Plasma (**pg ml-1**)** | | | | |
| Adiponectin | 1.86e+7 (3.94e+6) | 1.80e+7 (3.50e+6) | 0.96 | t(4)= 1.726, *P* = 0.159  -1.76e+7 to 4.10e+5 |
| Cystatin C | 1.00e+6 (1.55e+5) | 9.60e+5 (1.4e+5) | 0.96 | t(4)= 1.114, *P* = 0.328  -1.44e+5 to 61357 |
| Eotaxin | 186 (41.9) | 151 (36.3) | 0.81 | t(4)= 2.309, *P* = 0.082  -76.78 to 7.060 |
| FAS | 9799 (2575) | 11096 (4109) | 1.13 | t(4)= 1.259, *P* = 0.277  -1562 to 4154 |
| Fractalkine | 959 (584) | 1586 (613) | 1.65 | t(2)= 34.46, ***P* = 0.001**  548.90 to 705.60 |
| GROα | 95.1 (25.1) | 73.3 (16.1) | 0.77 | t(3)= 1.404, *P* = 0.255  -71.39 to 27.69 |
| GROβ | 386 (195) | 204 (87.7) | 0.53 | t(4)= 1.612, *P* = 0.182  -496.3 to 131.8 |
| ICAM-1 | 8.41e+5 (1.81e+5) | 9.10e+5 (1.6e+5) | 1.08 | t(4)= 1.908, *P* = 0.129  -30801 to 1.66e+5 |
| IL-1Ra | 278 (81.6) | 341 (154) | 1.23 | t(4)= 0.9284, *P* = 0.406  -125.5 to 251.5 |
| *IL-6 | 3.46 (1.85) | 4.97 (3.41) | 1.44 | t(4)= 2.097, *P* = 0.104  -0.488 to 3.500 |
| IL-8 | 3.78 (0.705) | 3.20 (0.700) | 0.85 | t(4)= 1.918, *P* = 0.128  -1.419 to 0.259 |
| MCP-1 | 183 (32.8) | 159 (31.3) | 0.87 | t(4)= 1.535, *P* = 0.110  -66.80 to 19.24 |
| MIP-3β | 96.5 (22.2) | 83.2 (23.8) | 0.86 | t(4)= 2.051, *P* = 0.110  -31.11 to 4.673 |
| MMP-2 | 4.75e+5 (94384) | 4.30e+5 (89063) | 0.91 | t(4)= 1.720, *P* = 0.161  -1.17e+5 to 27410 |
| MMP-7 | 2998 (2000) | 3224 (2092) | 1.08 | t(4)= 2.779, ***P* = 0.0499**  0.198 to 452.90 |
| MMP-8 | 2753 (2652) | 3421 (2848) | 1.24 | t(4)= 0.9481, *P* = 0.397  -1289 to 2625 |
| MPO | 82463 (1.15e+5) | 2.74e+5 (5.10e+5) | 3.32 | t(4)= 1.083, *P* = 0.340  -3.00e+5 to 6.83e+5 |
| PAI-1 | 20777 (6009) | 17794 (13207) | 0.86 | t(4)= 0.545, *P* = 0.615  -18181 to 12216 |
| PARC | 48069 (16843) | 49875 (16655) | 1.04 | t(4)= 2.091, *P* = 0.105  -591.80 to 4204 |
| PDGF-AA | 1118 (967) | 338 (178) | 0.30 | t(4)= 1.611, *P* = 0.182  -2125 to 564.20 |
| PDGF-AA/BB | 294 (228) | 98.1 (53.1) | 0.33 | t(4)= 1.613, *P* = 0.182  -532.80 to 141.20 |
| RAGE | 2406 (716) | 2188 (827) | 0.91 | t(4)= 1.767, *P* = 0.152  -559.6 to 124.4 |
| RANTES | 20671 (16131) | 5802 (3326) | 0.28 | t(4)= 1.850, *P* = 0.138  -37182 to 7444 |
| TARC | 276 (268) | 227 (145) | 0.82 | t(3)= 0.762, *P* = 0.502  -251.10 to 154.10 |
| TNFR1 | 2177 (520) | 2373 (667) | 1.09 | t(4)= 1.749, *P* = 0.155  -115.40 to 508.50 |
| uPAR | 1080 (462) | 1241 (624) | 1.15 | t(4)= 1.469, *P* = 0.216  -143.30 to 465.20 |
| VEGF | 50.8 (13.1) | 37.6 (8.73) | 0.74 | t(4)= 2.445, *P* = 0.071  -28.19 to 1.789 |
| **Cerebrospinal Fluid (**pg ml-1**)** | | | | |
| IL-1Ra | 55.7 (6.54) | 58.6 (10.5) | 1.05 | t(4)= 0.975*, P* = 0.385  -5.361 to 11.16 |
| *IL-6 | 2.72 (0.678) | 3.78 (0.669) | 1.39 | t(4)= 5.265, ***P* = 0.006**,  0.500 to 1.616 |
| MIP-3α | 8.48 (2.58) | 9.30 (4.07) | 1.10 | t(4)= 0.420, *P* = 0.696  -4.602 to 6.242 |
| MIP-3β | 75.24 (13.45) | 78.24 (14.21) | 1.04 | t(4)= 1.056, *P* = 0.351  -4.888 to 10.89 |
| MPO | 121 (118) | 242 (383) | 2.00 | t(4)= 0.997*, P* = 0.375  -215.80 to 457.80 |
| Sclerostin | 37.1 (33.8) | 34.8 (30.7) | 0.94 | t(4)=1.541*, P* = 0.198  -6.332 to 1.812 |
| TNF-α | 0.700 (0.186) | 0.720 (0.112) | 1.03 | t(4)= 0.309*, P* = 0.773  -0.157 to 0.196 |
| TNFRI | 997 (187) | 998 (159) | 1.00 | t(4)= 0.513, *P* = 0.635  -95.00 to 138.00 |
| **Urine (**mg ml-1**)** | | | | |
| Creatinine | 0.918 (0.408) | 0.933 (0.552) | 1.02 | t(3)= 0.159, *P* = 0.884  -0.285 to 0.315 |
| **Urine Protein Normalized to Creatinine (mg ml-1 Creatinine)** | | | | |
| CRP | 3.75 (5.22) | 27.5 (48.8) | 7.33 | t(3)= 1.088, *P* = 0.356  -45.71 to 93.20 |
| Cystatin C | 365 (210) | 352 (212) | 0.96 | t(3)= 0.786, *P* = 0.489  -67.17 to 40.57 |
| EGF | 120 (38.3) | 117 (40.2) | 0.98 | t(3)= 0.575, *P* = 0.605  -24.51 to 17.00 |
| FAS | 12.8 (4.63) | 19.0 (16.4) | 1.48 | t(3)= 1.012, *P* = 0.386  -13.16 to 25.44 |
| FIT-3L | 0.898 (0.295) | 1.97 (1.72) | 2.19 | t(3)= 1.215, *P* = 0.311  -1.73 to 3.86 |
| Fractalkine | 29.9 (12.3) | 30.3 (19.5) | 1.01 | t(2)= 0.080, *P* = 0.944  -18.32 to 19.01 |
| GDF-15 | 78.2 (64.6) | 66.2 (49.9) | 0.85 | t(3)= 1.561, *P* = 0.216  -36.25 to 12.39 |
| GROα | 0.995 (0.534) | 3.26 (3.73) | 3.28 | t(3)= 1.224, *P* = 0.308  -3.62 to 8.14 |
| ICAM-1 | 234 (24.0) | 289 (56.9) | 1.24 | t(2)=1.937, *P* = 0.192  -67.56 to 178.20 |
| IGFBP2 | 113 (37.1) | 121 (60.0) | 1.07 | t(3)= 0.620, *P* = 0.579  -30.00 to 44.50 |
| IL-1Ra | 60.5 (24.1) | 157 (121) | 2.60 | t(2)= 1.672, *P* = 0.237  -151.10 to 343.30 |
| IL-8 | 0.829 (0.695) | 1.45 (2.19) | 1.75 | t(2)= 0.795, *P* = 0.485  -1.88 to 3.13 |
| MCP-1 | 2.50 (2.51) | 2.01 (1.35) | 0.80 | t(2)= 0.812, *P* = 0.476  -2.42 to 1.44 |
| MIF | 57.80 (52.70) | 72.70 (73.30) | 1.25 | t(3)= 0.609, *P* = 0.586  -63.01 to 92.81 |
| MIP-3α | 1.19 (0.887) | 5.98 (6.44) | 5.03 | t(3)= 1.455, *P* = 0.242  -5.68 to 15.24 |
| MIP-3β | 0.369 (0.359) | 0.817 (1.07) | 2.21 | t(3)= 1.248, *P* = 0.301  -0.693 to 1.59 |
| MMP-2 | 6.86 (1.24) | 14.30 (14.0) | 2.08 | t(2)= 0.917, *P* = 0.456  -27.42 to 42.27 |
| MMP-3 | 2.76 (0.98) | 3.50 (1.56) | 1.27 | t(3)= 0.926, *P* = 0.423  -1.816 to 3.306 |
| MMP-7 | 117 (73.50) | 120 (76.40) | 1.03 | t(3)= 0.113, *P* = 0.917  -88.44 to 94.94 |
| MMP-8 | 16.1 (11.20) | 106 (166) | 6.58 | t(2)= 0.998, *P* = 0.424  -296.60 to 475.70 |
| MMP-9 | 64.0 (51.0) | 295 (512) | 4.61 | t(3)= 0.940, *P* = 0.417  -551.9 to 1014 |
| MMP-10 | 2.69 (1.57) | 5.12 (6.76) | 1.90 | t(3)= 0.872, *P* = 0.448  -6.457 to 11.33 |
| MPO | 181 (135) | 970 (1751) | 5.36 | t(3)= 0.931, *P* = 0.421  -1907 to 3484 |
| OPN | 8673 (5082) | 6917 (4420) | 0.80 | t(2)= 0.958, *P* = 0.409  -7589 to 4077 |
| PARC | 0.865 (0.717) | 1.26 (0.755) | 1.46 | t(3)= 0.925, *P* = 0.423  -0.958 to 1.743 |
| PDGF-AA | 0.470 (0.264) | 0.365 (0.151) | 0.78 | t(3)= 0.877, *P* = 0.445  -0.486 to 0.276 |
| RAGE | 211 (66.8) | 152 (24.4) | 0.72 | t(3)= 1.749, *P* = 0.179  -166.50 to 48.42 |
| TNFR-I | 15.00 (4.41) | 18.10 (7.02) | 1.21 | t(3)= 1.428, *P* = 0.249  -3.807 to 10.01 |
| TNFR-II | 23.60 (8.57) | 27.90 (6.56) | 1.18 | t(3)=2.101, *P* = 0.127  -2.21 to 10.81 |
| uPAR | 3.43 (1.30) | 4.46 (0.73) | 1.30 | t(3)= 1.624, *P* = 0.203  -0.995 to 3.070 |
| VEGF | 0.818 (0.167) | 0.835 (0.180) | 1.02 | t(3)= 0.200, *P* = 0.854  -0.261 to 0.296 |
| Note: Differential expression analysis was carried out by two-sided, paired sample t-test, 95% CI: 95percent confidence interval for the post *versus* baseline mean difference, *P* < 0.05. No correction for multiple comparisons was made due to small sample size (N= 3-5). Proteins listed in alphabetical order; statistically significant *P* values presented in bold. *: Prespecified secondary outcome. CRP = C-reactive protein, EGF = Epidermal growth factor, FAS = tumor necrosis factor receptor superfamily member 6, FIT = Fms related receptor tyrosine kinase, GDF = Growth/differentiation factor, GRO = Growth related protein, ICAM = Intercellular adhesion molecule, IGFBP = Insulin-like growth factor-binding protein-1, IL = interleukin, MCP = Monocyte chemoattractant protein, MIP = Macrophage inflammatory protein, MMP = Matrix metalloproteinases, MPO = Myeloperoxidase, PAI = Plasminogen activator inhibitor, PDGF = Platelet-derived growth factor, RAGE = Receptor for advanced glycation end products, RANTES = Regulated upon activation, normal T cell expressed and presumably secreted, TARC = Thymus- and activation-regulated chemokine, TNF = Tumor necrosis factor, uPAR = urikinase plasminogen activator surface receptor, VEGF = Vascular endothelial growth factor | | | | |

**Supplementary Table 3.** Baseline and post-treatment urinary metabolites measured by mass spectrometry

| **Urinary Metabolite** | **Baseline**  **Mean (SD)** | **Post-Treatment**  **Mean (SD)** | **Fold Change** | **T-test(df), *P* value,**  **95% CI** |
| --- | --- | --- | --- | --- |
| Creatinine (µM) | 4957 (2594) | 4686 (2502) | 0.95 | t(3) = 0.259, *P* = 0.812  -3595 to 3053 |
| **Analyte uM mM-1 Creatinine** | | | | |
| Alanine | 44.9 (31.1) | 38.7 (24.9) | 0.86 | t(3) = 0.408, *P* = 0.711  -55.14 to 42.61 |
| Arginine | 3.77 (0.887) | 4.25 (1.90) | 1.13 | t(3) = 0.586, *P* = 0.599  -2.118 to 3.073 |
| Cysteine | 1.22 (0.525) | 2.48 (2.81) | 2.03 | t(3) = 0.902, *P* = 0.434  -3.191 to 5.716 |
| Glycine | 196 (278) | 181 (201) | 0.92 | t(3) = 0.385, *P* = 0.726  -138.7 to 108.8 |
| Histidine | 35.1 (6.45) | 44.5 (25.2) | 1.27 | t(3) = 0.682, *P* = 0.544  -34.61 to 53.48 |
| Isoleucine | 61.9 (60.6) | 59.6 (48.4) | 0.96 | t(3) = 0.0737, *P* = 0.946  -101.5 to 96.90 |
| Leucine | 58.0 (60.9) | 51.1 (37.6) | 0.88 | t(3) = 0.287, *P* = 0.793  -84.11 to 70.19 |
| Lysine | 21.6 (9.26) | 22.5 (22.9) | 1.04 | t(3) = 0.115, *P* = 0.915  -23.79 to 25.58 |
| Methionine | 14.7 (7.39) | 9.06 (5.19) | 0.62 | t(3) = 1.295, *P* = 0.286  -19.49 to 8.215 |
| Pipecolate | 4.19 (4.79) | 2.84 (2.58) | 0.68 | t(3) = 1.216, *P* = 0.311  -4.893 to 2.188 |
| Phenylalanine | 4.08 (3.01) | 6.21 (1.78) | 1.52 | t(3) = 1.208, *P* = 0.314  -3.488 to 7.758 |
| Proline | 12.6 (22.0) | 26.4 (49.3) | 2.10 | t(3) = 1.014, *P* = 0.385  -29.54 to 57.16 |
| Tryptophan | 11.2 (18.5) | 2.17 (4.33) | 0.19 | t(3) = 0.875, *P* = 0.446  -41.84 to 23.80 |
| Note: Baseline to post-treatment changes were assessed using two-sided, paired sample t-tests, 95% CI: 95 percent confidence interval for the post *versus* baseline mean difference, *P* < 0.05. No correction for multiple comparisons was made due to small sample size (N = 4). | | | | |

**Supplementary Table 4:** Baseline to post-treatment differential expression of Conserved Transcriptional Response to Adversity (CTRA) genes

| **Gene** | **Baseline**  **Mean (SD)** | **Post-Treatment**  **Mean (SD)** | **Fold Change** | **T-test(df), *P* value,**  **B-statistic** |
| --- | --- | --- | --- | --- |
| **Inflammatory Genes** | | | | |
| *FOS* | 2380.30 (1083.30) | 800.98 (251.87) | 0.34 | t(3) = -4.359, ***P* = 0.005**,  B = -1.669 |
| *FOSB* | 299.83 (207.83) | 80.956 (45.92) | 0.27 | t(3) = -5.302, ***P* = 0.002**,  B = -0.713 |
| *FOSL1* | BDT | BDT | N/A | N/A |
| *FOSL2* | 1548.96 (305.240) | 1350.91 (280.59) | 0.87 | t(3) = -1.003, *P* = 0.354,  B = -5.845 |
| *IL1α* | BDT | BDT | N/A | N/A |
| *IL1β* | 288.76 (39.46) | 135.82 (61.01) | 0.47 | t(3) = -4.131, ***P* = 0.006**,  B = -1.922 |
| *IL6* | BDT | BDT | N/A | N/A |
| *IL8* | 842.27 (563.01) | 166.34 (84.91) | 0.20 | t(3) = -4.789, ***P* = 0.003**,  B = -1.215 |
| *JUN* | 539.33 (132.03) | 333.76 (137.30) | 0.62 | t(3) = -2.663, ***P* = 0.037**,  B = -3.754 |
| *JUNB* | 3005.00 (873.97) | 1737.71 (436.42) | 0.58 | t(3) = -2.818, ***P* = 0.030**,  B = -3.546 |
| *JUND* | 801.92 (297.32) | 675.95 (141.83) | 0.84 | t(3) = -0.853, *P* = 0.426,  B = -5.982 |
| *NF*κ*B1* | 224.43 (22.98) | 219.38 (24.75) | 0.98 | t(3) = -0.178, *P* = 0.864,  B = -6.353 |
| *NF*κ*B2* | 485.25 (134.44) | 373.89 (57.52) | 0.77 | t(3) = -1.549, *P* = 0.172,  B = -5.233 |
| *PTGS1* | 202.86 (69.99) | 167.62 (58.76) | 0.83 | t(3) = -1.317, *P* = 0.236,  B = -5.511 |
| *PTGS2* | 490.51 (351.34) | 112.75 (41.66) | 0.23 | t(3) = -4.826, ***P* = 0.003**,  B = -1.177 |
| *REL* | 288.01 (65.22) | 282.61 (65.50) | 0.98 | t(3) = -0.184, *P* = 0.860,  B = -6.352 |
| *RELA* | 168.35 (21.92) | 174.54 (19.19) | 1.04 | t(3) = 0.304, *P* = 0.771,  B = -6.319 |
| *RELB* | 143.65 (14.66) | 131.40 (24.77) | 0.91 | t(3) = -0.815, *P* = 0.446,  B = -6.015 |
| *TNF* | 36.42 (8.64) | 34.72 (7.02) | 0.95 | t(2) = 0.636, *P* = 0.548,  B = -6.149 |
| ***Type-1 Interferon Response Genes*** | | | | |
| *GBP1* | 463.26 (147.30) | 420.83 (256.33) | 0.91 | t(3) = -0.996, *P* = 0.357,  B = -5.852 |
| *IFI16* | 1135.22 (174.40) | 1199.46 (35.70) | 1.06 | t(3) = 0.504, *P* = 0.632,  B = -6.230 |
| *IFI27* | 60.03 (12.03) | 67.70 (6.84) | 1.13 | t(3) = 0.962, *P* = 0.373,  B = -5.884 |
| *IFI27L1* | 22.77 (1.40) | 28.90 (1.22) | 1.27 | t(1) = 2.331, *P* = 0.058,  B = -4.201 |
| *IFI27L2* | 139.11 (49.95) | 133.85 (22.35) | 0.96 | t(3) = 0.015, *P* = 0.988,  B = -6.371 |
| *IFI30* | 3630.95 (939.14) | 3947.86 (784.55) | 1.09 | t(3) = 0.487, *P* = 0.644,  B = -6.239 |
| *IFI35* | 164.76 (22.65) | 172.01 (70.66) | 1.04 | t(3) = -0.018, *P* = 0.986,  B = -6.371 |
| *IFI44* | 410.95 (145.43) | 390.52 (259.95) | 0.95 | t(3) = -0.780, *P* = 0.465,  B = -6.043 |
| *IFI44L* | 386.90 (225.78) | 416.09 (457.62) | 1.08 | t(3) = -0.695, *P* = 0.513,  B = -6.108 |
| *IFI6* | 79.78 (32.91) | 92.03 (62.07 | 1.15 | t(3) = 0.330, *P* = 0.753,  B = -6.310 |
| *IFIH1* | 177.62 (33.91) | 165.21 (35.46) | 0.93 | t(3) = -0.547, *P* = 0.604,  B = -6.206 |
| *IFIT1* | 36.93 (2.77) | 63.93 (60.34) | 1.73 | t(1) = 0.594, *P* = 0.574,  B = -6.177 |
| *IFIT1L* | BDT | BDT | N/A | N/A |
| *IFIT2* | 103.07 (49.62) | 108.01 (39.70) | 1.04 | t(3) = 0.244, *P* = 0.815,  B = -6.337 |
| *IFIT3* | 52.91 (7.61) | 88.75 (87.02) | 1.68 | t(1) = 0.081, *P* = 0.938,  B = -6.367 |
| *IFIT5* | 100.82 (6.03) | 108.32 (13.79) | 1.07 | t(3) = 0.545, *P* = 0.606,  B = -6.207 |
| *IFITM1* | 928.59 (412.18) | 1321.56 (254.14) | 1.42 | t(3) = 1.875, *P* = 0.110,  B = -4.814 |
| *IFITM2* | 132.23 (28.81) | 127.44 (16.35) | 0.96 | t(3) = -0.171, *P* = 0.870,  B = -6.354 |
| *IFITM3* | 1416.08 (634.74) | 1868.87 (992.82) | 1.32 | t(3) = 1.209, *P* = 0.272,  B = -5.632 |
| *IFITM4P* | 940.06 (357.69) | 1303.47 (410.59) | 1.39 | t(3) = 1.869, *P* = 0.110,  B = -4.822 |
| *IFITM5* | BDT | BDT | N/A | N/A |
| *IFNB1* | BDT | BDT | N/A | N/A |
| *IRF2* | 308.92 (85.86) | 318.00 (27.61) | 1.03 | t(3) = 0.326, *P* = 0.755,  B = -6.311 |
| *IRF7* | 300.35 (69.70) | 253.46 (83.95) | 0.84 | t(3) = -1.317, *P* = 0.236,  B = -5.511 |
| *IRF8* | 655.92 (109.03) | 577.83 (71.88) | 0.88 | t(3) = -1.1045, *P* = 0.336,  B = -5.804 |
| *MX1* | 245.94 (94.59) | 279.82 (177.71) | 1.14 | t(3) = 0.396, *P* = 0.706,  B = -6.283 |
| *MX2* | 505.54 (105.10) | 504.23 (93.58) | 1.00 | t(3) = 0.017, *P* = 0.987,  B = -6.371 |
| *OAS1* | 605.27 (68.24) | 609.02 (116.55) | 1.01 | t(3) = -0.027, *P* = 0.979,  B = -6.370 |
| *OAS2* | 703.57 (28.97) | 770.14 (292.16) | 1.09 | t(3) = 0.290, *P* = 0.781,  B = -6.323 |
| *OAS3* | 180.85 (42.95) | 219.54 (166.82) | 1.21 | t(3) = 0.219, *P* = 0.834,  B = -6.344 |
| *OASL* | 42.52 (4.01) | 59.55 (35.14) | 1.40 | t(3) = 0.970, *P* = 0.369,  B = -5.877 |
| **Antibody Synthesis Genes** | | | | |
| *IGJ* | 796.23 (424.95) | 913.01 (607.34) | 1.15 | t(3) = 0.524, *P* = 0.619,  B = -6.219 |
| *IGLL1* | BDT | BDT | N/A | N/A |
| *IGLL3* | BDT | BDT | N/A | N/A |
| Note: Baseline to post-treatment differential expression analysis of normalized gene counts carried out by the moderated t-test, unadjusted *P* < 0.05. No correction for multiple comparisons was made due to small sample size (N = 2-4). Genes listed by category, then alphabetically; statistically significant *P* values presented in bold. BDT = below detection threshold, < 20, df = degrees of freedom, *FOS* = Fos proto-oncogene, *GBP* = guanylate binding protein gene, *IFI* = interferon-inducible protein gene, *IFIH* = interferon-induced protein with helicase C, *IFIT* = interferon-induced protein with tetratricopeptide repeats, *IFITM* = interferon-induced transmembrane, *IFNB* = interferon-β, *IGJ* = immunoglobulin joining chain, *IGLL* = immunoglobulin λ locus, *IL* = interleukin, *IRF* = Interferon regulatory factor, *JUN* = Jun proto-oncogene, *MX* = Myxovirus resistance, *NF*κ*B* = Nuclear factor-κB, *OAS* = 2’-5’-oligoadenylate synthetase, OASL = 2’-5’-oligoadenylate synthetase like, *PTGS* = Prostaglandin-endoperoxidase synthase, *REL* = v-rel avian reticuloendotheliosis viral oncogene homolog, SD = standard deviation, *TNF* = tumor necrosis factor | | | | |
